# Supplementary material for: In vitro simulated digestion and fecal fermentation of exopolysaccharides from Lacticaseibacillus paracasei GL1
Source: Royal Society of Chemistry journal article supplement (doi:10.1039/d3fo00676j), 2023-01-01
Supplement: d3fo00676j1.pdf [file d3fo00676j1.pdf]

## Supporting information

*In vitro* simulated digestion and fecal fermentation of exopolysaccharide from  
*Lactocaseibacillus paracasei* GL1

Xiaomeng Wang<sup>a</sup>, Juanjuan Tian<sup>a</sup>, Nanyu Tang<sup>a</sup>, Xueliang Zhang<sup>a</sup>, Luyao Xiao<sup>a</sup>, Mengjia Xu<sup>a,b</sup>,  
Mingsheng Dong<sup>a</sup>, Wei Li<sup>a,\*</sup>

<sup>a</sup>College of Food Science and Technology, Nanjing Agricultural University, Nanjing, Jiangsu  
210095, P.R. China.

<sup>b</sup>Affiliated Cixi Hospital, Wenzhou Medical University, Cixi 315300, Zhejiang, P.R. China

**\*Corresponding author:**

Dr Wei Li\*

College of Food Science and Technology

Nanjing Agricultural University

1 Weigang Road, Nanjing, Jiangsu, P.R. China

Tel: +86 25 84399910

E-mail address: lw1981@njau.edu.cn

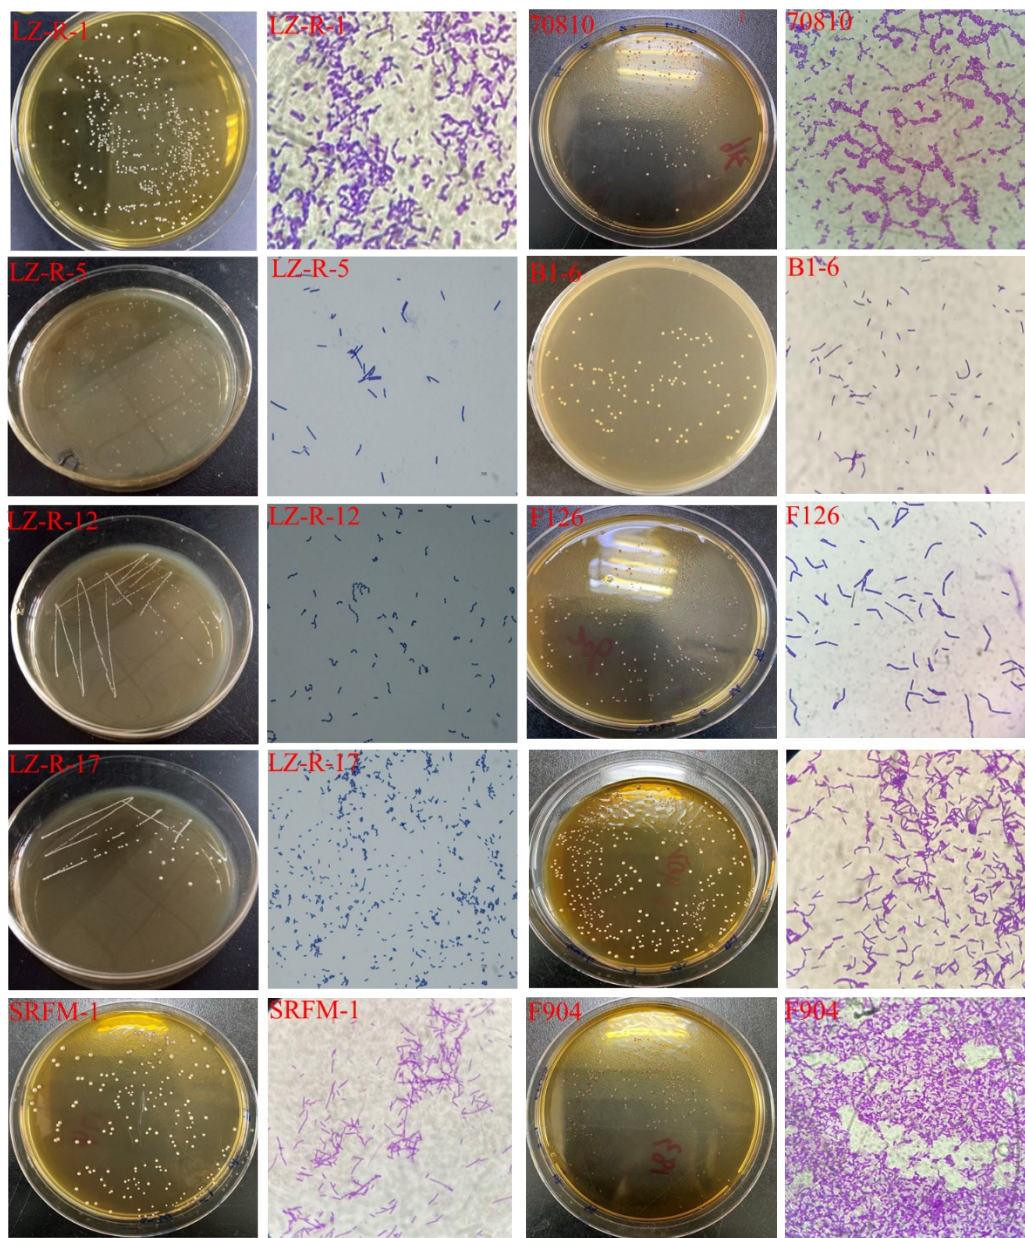

**Fig. S1** The colony morphology and microscope observation of ten LAB.

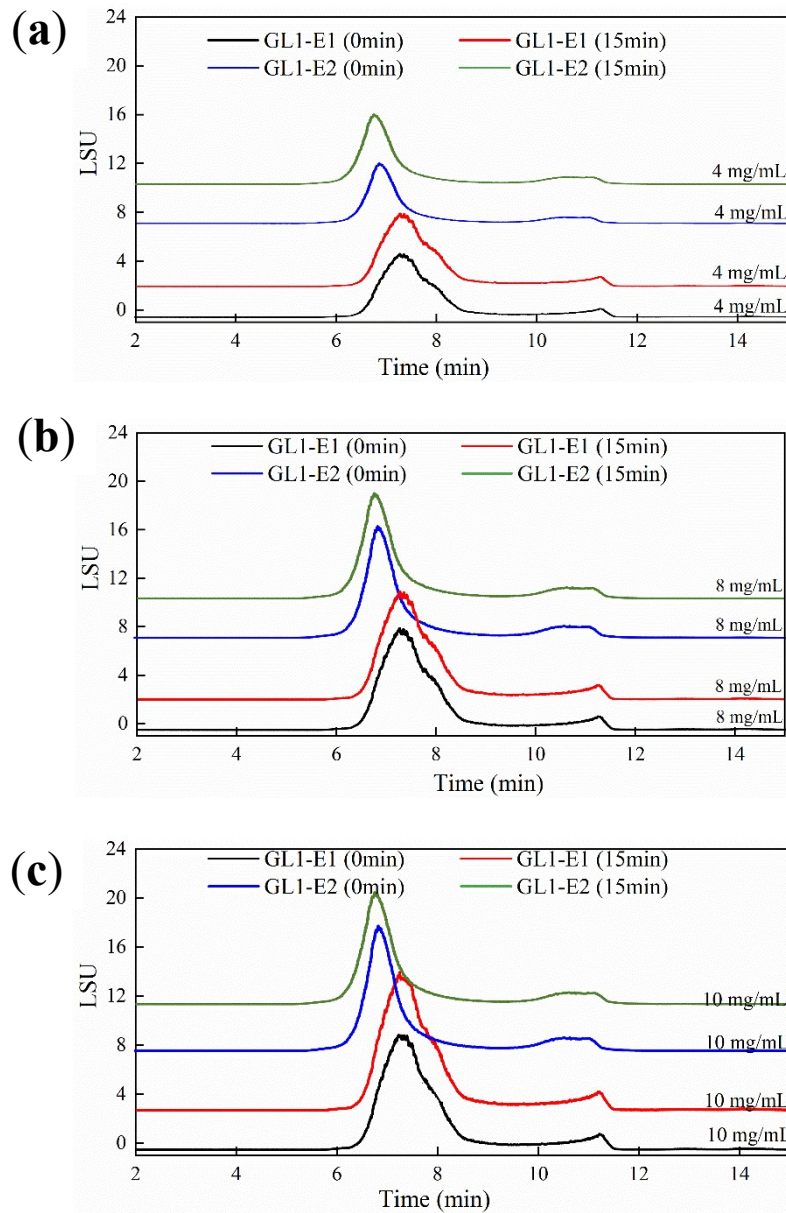

**Fig. S2** Mw changes of 4 mg/mL (a), 8 mg/mL (b), and 10 mg/mL (c) concentrations of GL1-E1 and GL1-E2 before and after saliva digestion.
